# Supplementary material
Source: PubMed Central journal article supplement (PMC7963719)
Supplement: 17-00481.pdf [file 17-00481.pdf]

**On-line Table 1: Sequence parameters of study MR imaging examinations**

| Sequence                     | T1 (Pre/Post)            | T2 (Pre)     | FLAIR (Pre)    |
|------------------------------|--------------------------|--------------|----------------|
| Sequence type                | SE/TSE (GRE)             | TSE          | TSE            |
| Orientation                  | Axial                    | Axial        | Axial          |
| TR                           | 450–650 ms (GRE, 250 ms) | 2500–4000 ms | 6000–11,000 ms |
| TE                           | 7–16 ms (GRE, 2.4–4 ms)  | 70–120 ms    | 120–140 ms     |
| T1                           | –                        | –            | 2000–2800 ms   |
| Acquisitions (NSA/NEX)       | 1–2                      | 1            | 1              |
| Section thickness            | 3–5 mm                   | 3–5 mm       | 3–5 mm         |
| No. of sections <sup>a</sup> | 28–50                    | 28–50        | 28–50          |
| Section gap <sup>b</sup>     | ≤10%                     | ≤10%         | ≤10%           |
| FOV (readout)                | 220–240 mm               | 220–240 mm   | 220–240 mm     |

**Note:**—GRE indicates gradient recalled-echo; NSA, number of signal averages; Pre, precontrast; Post, postcontrast; SE, spin-echo.

<sup>a</sup> All sequences with the same number of sections, sufficient to cover the complete brain anatomy from the foramen magnum to the vertex.

<sup>b</sup> The same section gap for all sequences. For 3D FLAIR images, axial reformatted section thickness was equal to that in the 2D axial section plus the gap (intersection interval).

**On-line Table 2: Demographic characteristics (safety set)<sup>a</sup>**

|                                      | Arm 1                                     | Arm 2                                     | Total (n = 268) |
|--------------------------------------|-------------------------------------------|-------------------------------------------|-----------------|
|                                      | Gadoterate Meglumine/Gadobutrol (n = 138) | Gadobutrol/Gadoterate Meglumine (n = 130) |                 |
| Age (yr)                             |                                           |                                           |                 |
| Mean (SD)                            | 52.9 (15.2)                               | 54.4 (15.1)                               | 53.6 (15.1)     |
| Median                               | 53                                        | 56                                        | 55              |
| Min; Max                             | 19; 98                                    | 18; 91                                    | 18; 98          |
| Sex (No.) (%)                        |                                           |                                           |                 |
| Female                               | 87 (63.0%)                                | 85 (65.4%)                                | 172 (64.2%)     |
| Male                                 | 51 (37.0%)                                | 45 (34.6%)                                | 96 (35.8%)      |
| Body mass index (kg/m <sup>2</sup> ) |                                           |                                           |                 |
| Mean (SD)                            | 27.71 (5.35)                              | 27.62 (5.23)                              | 27.66 (5.28)    |
| Median                               | 27.1                                      | 27.1                                      | 27.1            |
| Min; Max                             | 17.4; 43.4                                | 18.8; 51.2                                | 17.4; 51.2      |
| Missing                              | 1                                         | 1                                         | 2               |

**Note:**—Min indicates minimum; Max, maximum.

<sup>a</sup> No missing data unless otherwise stated.

**On-line Table 3: Sum of scores for lesion border delineation, visualization of internal morphology, and degree of contrast enhancement at the patient level**

|                                             | LS Mean <sup>a</sup> (SE) |             | LS Mean <sup>a</sup> Difference (95% CI) | P Value |
|---------------------------------------------|---------------------------|-------------|------------------------------------------|---------|
|                                             | Gadoterate Meglumine      | Gadobutrol  |                                          |         |
| Border delineation <sup>b</sup>             |                           |             |                                          |         |
| Reader 1                                    | 1.83 (0.06)               | 1.81 (0.06) | 0.02 (−0.08 to 0.13)                     | .665    |
| Reader 2                                    | 1.67 (0.05)               | 1.69 (0.05) | −0.01 (−0.10 to 0.07)                    | .713    |
| Reader 3                                    | 2.04 (0.06)               | 2.12 (0.06) | −0.09 (−0.18 to −0.00)                   | .049    |
| Internal morphology                         |                           |             |                                          |         |
| Reader 1                                    | 2.12 (0.05)               | 2.07 (0.05) | 0.05 (−0.04 to 0.14)                     | .257    |
| Reader 2                                    | 1.87 (0.05)               | 1.91 (0.05) | −0.03 (−0.11 to 0.05)                    | .405    |
| Reader 3                                    | 2.16 (0.05)               | 2.22 (0.05) | −0.06 (−0.14 to 0.03)                    | .180    |
| Degree of contrast enhancement <sup>c</sup> |                           |             |                                          |         |
| Reader 1                                    | 1.99 (0.06)               | 1.97 (0.06) | 0.02 (−0.08 to 0.11)                     | .725    |
| Reader 2                                    | 2.00 (0.07)               | 2.01 (0.07) | −0.01 (−0.08 to 0.07)                    | .845    |
| Reader 3                                    | 1.98 (0.06)               | 2.04 (0.06) | −0.06 (−0.14 to 0.02)                    | .154    |

**Note:**—SE indicates standard error.

<sup>a</sup> LS means are the means controlled for covariates of the model.

<sup>b</sup> Three-point scale of border delineation and internal morphology: 0, unevaluable; 1, seen, but imperfectly; and 2, seen completely/perfectly.

<sup>c</sup> Three-point scale of the degree of contrast enhancement: 0, nil; 1, mild enhancement; and 2, strong enhancement.
